# Supplementary material for: Integrated analysis of cytochrome P450 gene superfamily in the red flour beetle, Tribolium castaneum
Source: PubMed Central journal article supplement (PMC3682917; doi:10.1186/1471-2164-14-174), 2013-03-14
Supplement: 1471-2164-14-174-S1.pdf [file 1471-2164-14-174-S1.pdf]

Additional file 1: List of P450s in *Tribolium castaneum*

| No. | Clan | Name       | Accession No. | Symbol Synonyms | Map position | Length (amino acid) |
|-----|------|------------|---------------|-----------------|--------------|---------------------|
| 1   | 2    | CYP15A1    | EFA01264      | GLEAN_02551     | LG3          | 492                 |
| 2   | 2    | CYP18A1    | EFA10669      | GLEAN_01947     | LG9          | 527                 |
| 3   | 2    | CYP303A1   | EFA01261      | GLEAN_02542     | LG3          | 493                 |
| 4   | 2    | CYP304E1   | EEZ99196      | GLEAN_00411     | LG2          | 501                 |
| 5   | 2    | CYP305A1   | EFA01265      | GLEAN_02552     | LG3          | 493                 |
| 6   | 2    | CYP306A1   | EFA10665      | GLEAN_01916     | LG9          | 481                 |
| 7   | 2    | CYP307A1   | EFA11558      | GLEAN_04159     | LG1=X        | 535                 |
| 8   | 2    | CYP307B1   | EFA05673      | GLEAN_15030     | LG6          | 487                 |
| 9   | Mito | CYP12H1    | EFA07581      | GLEAN_16365     | LG7          | 535                 |
| 10  | Mito | CYP49A1    | EFA07521      | GLEAN_09877     | LG7          | 539                 |
| 11  | Mito | CYP301A1   | EFA02906      | GLEAN_08302     | LG4          | 522                 |
| 12  | Mito | CYP301B1   | EFA02807      | GLEAN_07167     | LG4          | 513                 |
| 13  | Mito | CYP302A1   | EFA04695      | GLEAN_14691     | LG5          | 510                 |
| 14  | Mito | CYP314A1   | EEZ97722      | GLEAN_11231     | LG10         | 488                 |
| 15  | Mito | CYP315A1   | EFA04669      | GLEAN_14274     | LG5          | 465                 |
| 16  | Mito | CYP334B1   | EFA02864      | GLEAN_07770     | LG4          | 582                 |
| 17  | Mito | CYP353A1   | EFA01331      | GLEAN_03480     | LG3          | 465                 |
| 18  | 3    | CYP6BK1    | EFA12637      | GLEAN_10256     | Unknown      | 488                 |
| 19  | 3    | CYP6BK2    | EFA12636      | GLEAN_10255     | Unknown      | 512                 |
| 20  | 3    | CYP6BK3    | EFA12635      | GLEAN_10254     | Unknown      | 506                 |
| 21  | 3    | CYP6BK4    | EFA12634      | GLEAN_10253     | Unknown      | 507                 |
| 22  | 3    | CYP6BK5    | EFA12633      | GLEAN_10252     | Unknown      | 259                 |
| 23  | 3    | CYP6BK6    | EFA12632      | GLEAN_10238     | Unknown      | 493                 |
| 24  | 3    | CYP6BK7    | EFA12631      | GLEAN_10239     | Unknown      | 490                 |
| 25  | 3    | CYP6BK8P*  | ---           | GLEAN_10241     | Unknown      | ---                 |
| 26  | 3    | CYP6BK9P*  | ---           | GLEAN_10242     | Unknown      | ---                 |
| 27  | 3    | CYP6BK10   | EFA12630      | GLEAN_10243     | Unknown      | 497                 |
| 28  | 3    | CYP6BK11   | EFA05683      | GLEAN_15102     | LG6          | 503                 |
| 29  | 3    | CYP6BK12   | EFA12529      | GLEAN_03741     | Unknown      | 491                 |
| 30  | 3    | CYP6BK13   | EFA05693      | GLEAN_15160     | LG6          | 496                 |
| 31  | 3    | CYP6BK14   | EFA05731      | GLEAN_15551     | LG6          | 488                 |
| 32  | 3    | CYP6BK15P* | ---           | GLEAN_03742     | Unknown      | ---                 |
| 33  | 3    | CYP6BK16P* | ---           | GLEAN_15550     | Unknown      | ---                 |
| 34  | 3    | CYP6BL1    | EFA05684      | GLEAN_15103     | LG6          | 471                 |
| 35  | 3    | CYP6BM1    | EFA12639      | GLEAN_10236     | Unknown      | 491                 |
| 36  | 3    | CYP6BN1    | EFA05730      | GLEAN_15546     | LG6          | 485                 |
| 37  | 3    | CYP6BP1    | EFA12638      | GLEAN_10237     | Unknown      | 475                 |
| 38  | 3    | CYP6BP2P   | ---           | ---             | Unknown      | ---                 |
| 39  | 3    | CYP6BQ1    | EFA02816      | GLEAN_07310     | LG4          | 513                 |
| 40  | 3    | CYP6BQ2    | EFA02817      | GLEAN_07311     | LG4          | 520                 |
| 41  | 3    | CYP6BQ3P*  | ---           | GLEAN_07312     | LG4          | ---                 |
| 42  | 3    | CYP6BQ4    | EFA02818      | GLEAN_07313     | LG4          | 520                 |
| 43  | 3    | CYP6BQ5    | EFA02819      | GLEAN_07314     | LG4          | 519                 |
| 44  | 3    | CYP6BQ6    | EFA02820      | GLEAN_07315     | LG4          | 520                 |
| 45  | 3    | CYP6BQ7    | EFA02821      | GLEAN_07316     | LG4          | 519                 |
| 46  | 3    | CYP6BQ8    | EFA02822      | GLEAN_07317     | LG4          | 516                 |
| 47  | 3    | CYP6BQ9    | ADH29767      | GLEAN_07318     | LG4          | 521                 |
| 48  | 3    | CYP6BQ10   | EFA02823      | GLEAN_07320     | LG4          | 520                 |
| 49  | 3    | CYP6BQ11   | EFA02824      | GLEAN_07321     | LG4          | 520                 |
| 50  | 3    | CYP6BQ12   | EFA02825      | GLEAN_07322     | LG4          | 521                 |
| 51  | 3    | CYP6BQ13   | EEZ99338      | GLEAN_04818     | LG2          | 518                 |
| 52  | 3    | CYP6BQ14P* | ---           | GLEAN_09951     | Unknown      | ---                 |

|     |   |           |              |             |         |      |
|-----|---|-----------|--------------|-------------|---------|------|
| 53  | 3 | CYP6BR1   | EFA12629     | GLEAN_10251 | Unknown | 494  |
| 54  | 3 | CYP6BR2   | EFA12628     | GLEAN_10244 | Unknown | 499  |
| 55  | 3 | CYP6BR3   | EFA12627     | GLEAN_10245 | Unknown | 497  |
| 56  | 3 | CYP6BS1   | EEZ99243     | GLEAN_00856 | LG2     | 514  |
| 57  | 3 | CYP6BT1   | EFA05733     | GLEAN_15553 | LG6     | 442  |
| 58  | 3 | CYP345A1  | EFA12856     | GLEAN_00152 | Unknown | 505  |
| 59  | 3 | CYP345A2  | EFA12857     | GLEAN_00153 | Unknown | 505  |
| 60  | 3 | CYP345B1  | EFA12855     | GLEAN_00151 | Unknown | 506  |
| 61  | 3 | CYP345C1  | EFA12854     | GLEAN_00148 | Unknown | 497  |
| 62  | 3 | CYP345D1  | EFA05713     | GLEAN_15320 | LG6     | 494  |
| 63  | 3 | CYP345D2  | EFA12532     | GLEAN_03745 | Unknown | 492  |
| 64  | 3 | CYP346A1  | EFA04674     | GLEAN_14346 | LG5     | 502  |
| 65  | 3 | CYP346A2  | EFA04605     | GLEAN_13433 | LG5     | 497  |
| 66  | 3 | CYP346B1  | EFA04676     | GLEAN_14359 | LG5     | 503  |
| 67  | 3 | CYP346B2  | EFA04677     | GLEAN_14360 | LG5     | 493  |
| 68  | 3 | CYP346B3  | EFA04678     | GLEAN_14361 | LG5     | 503  |
| 69  | 3 | CYP347A1  | EFA04564     | GLEAN_10955 | LG5     | 520  |
| 70  | 3 | CYP347A2  | EEZ97687     | GLEAN_16235 | LG10    | 1390 |
| 71  | 3 | CYP347A3  | EEZ97687     | GLEAN_10955 | LG10    | ---  |
| 72  | 3 | CYP347A4  | XP_001809620 | GLEAN_16235 | LG10    | 490  |
| 73  | 3 | CYP348A1  | EFA07573     | GLEAN_15916 | LG7     | 428  |
| 74  | 3 | CYP9D1    | EFA09143     | GLEAN_05354 | LG8     | 463  |
| 75  | 3 | CYP9D2    | XP_001815543 | GLEAN_05353 | LG8     | 516  |
| 76  | 3 | CYP9D3    | EFA07793     | ---         | LG8     | 965  |
| 77  | 3 | CYP9D4    | EFA09142     | GLEAN_05352 | LG8     | 524  |
| 78  | 3 | CYP9D5    | EFA09141     | GLEAN_05351 | LG8     | 523  |
| 79  | 3 | CYP9D6*   | ---          | ---         | Unknown | ---  |
| 80  | 3 | CYP9D7    | EFA07804     | GLEAN_05365 | LG8     | 811  |
| 81  | 3 | CYP9D8    | XP_973646    | ---         | LG8     | 379  |
| 82  | 3 | CYP9W1    | EFA09151     | GLEAN_05387 | LG8     | 480  |
| 83  | 3 | CYP9X1    | EFA09150     | GLEAN_05386 | LG8     | 507  |
| 84  | 3 | CYP9Y1    | XP_972348    | GLEAN_06763 | LG8     | 505  |
| 85  | 3 | CYP9Z1    | EFA09239     | GLEAN_06441 | LG8     | 497  |
| 86  | 3 | CYP9Z2    | EFA09240     | GLEAN_06442 | LG8     | 531  |
| 87  | 3 | CYP9Z3    | EFA09241     | GLEAN_06443 | LG8     | 504  |
| 88  | 3 | CYP9Z4    | EFA09242     | GLEAN_06444 | LG8     | 530  |
| 89  | 3 | CYP9Z5    | EFA09243     | GLEAN_06445 | LG8     | 503  |
| 90  | 3 | CYP9Z6    | EFA09275     | GLEAN_15218 | LG8     | 526  |
| 91  | 3 | CYP9Z7    | EFA09278     | GLEAN_15487 | LG8     | 484  |
| 92  | 3 | CYP9AA1   | EFA09276     | GLEAN_15219 | LG8     | 497  |
| 93  | 3 | CYP9AB1   | EFA09148     | GLEAN_05384 | LG8     | 530  |
| 94  | 3 | CYP9AC1   | EFA01242     | GLEAN_00282 | LG3     | 532  |
| 95  | 3 | CYP9AD1   | EEZ99187     | GLEAN_00282 | LG2     | 534  |
| 96  | 3 | CYP9AF1   | EFA09149     | GLEAN_05385 | LG8     | 477  |
| 97  | 4 | CYP4G7    | NP_001107860 | GLEAN_07061 | LG4     | 553  |
| 98  | 4 | CYP4G14   | NP_001107791 | GLEAN_08058 | LG4     | 560  |
| 99  | 4 | CYP4Q1    | EFA10754     | GLEAN_12501 | LG9     | 503  |
| 100 | 4 | CYP4Q2    | EFA10753     | GLEAN_12500 | LG9     | 504  |
| 101 | 4 | CYP4Q3    | EFA10752     | GLEAN_12499 | LG9     | 503  |
| 102 | 4 | CYP4Q4    | AAP94193     | GLEAN_12503 | LG9     | 491  |
| 103 | 4 | CYP4Q5    | EFA10757     | GLEAN_12504 | LG9     | 493  |
| 104 | 4 | CYP4Q6    | EFA10781     | GLEAN_12662 | LG9     | 496  |
| 105 | 4 | CYP4Q7v1  | EFA10755     | GLEAN_12502 | LG9     | 505  |
| 106 | 4 | CYP4Q7v2* | AAP94192     | ---         | LG9     | 505  |
| 107 | 4 | CYP4Q8    | XP_970987    | GLEAN_12497 | LG9     | 327  |
| 108 | 4 | CYP4Q9P   | EFA10751     | GLEAN_12498 | LG9     | 427  |

|     |   |            |              |             |         |      |
|-----|---|------------|--------------|-------------|---------|------|
| 109 | 4 | CYP4AA1    | EFA01330     | GLEAN_03478 | LG3     | 482  |
| 110 | 4 | CYP4BR1    | EFA01322     | GLEAN_03368 | LG3     | 493  |
| 111 | 4 | CYP4BR2P*  | ---          | ---         | Unknown | ---  |
| 112 | 4 | CYP4BR3    | EFA01323     | GLEAN_03369 | LG3     | 501  |
| 113 | 4 | CYP4BM1    | EFA07488     | GLEAN_09412 | LG7     | 511  |
| 114 | 4 | CYP4BN1    | NP_001123993 | GLEAN_14125 | LG5     | 506  |
| 115 | 4 | CYP4BN2    | EFA04617     | GLEAN_13681 | LG5     | 492  |
| 116 | 4 | CYP4BN3    | EFA04616     | GLEAN_13680 | LG5     | 499  |
| 117 | 4 | CYP4BN4    | EFA04615     | GLEAN_13679 | LG5     | 499  |
| 118 | 4 | CYP4BN5    | EFA09279     | GLEAN_15992 | LG8     | 498  |
| 119 | 4 | CYP4BN6    | EFA04535     | GLEAN_10423 | LG5     | 503  |
| 120 | 4 | CYP4BN7    | EFA04629     | GLEAN_13773 | LG5     | 487  |
| 121 | 4 | CYP4BN8    | EFA04628     | GLEAN_13772 | LG5     | 481  |
| 122 | 4 | CYP4BN9    | NP_001164235 | GLEAN_02722 | LG3     | 504  |
| 123 | 4 | CYP4BN10   | EFA01272     | GLEAN_02721 | LG3     | 501  |
| 124 | 4 | CYP4BN11   | NP_001123994 | GLEAN_14641 | LG5     | 492  |
| 125 | 4 | CYP349A1   | EFA05711     | GLEAN_15296 | LG6     | 488  |
| 126 | 4 | CYP349A2   | EFA05168     | GLEAN_15295 | LG6     | 814  |
| 127 | 4 | CYP349A3P* | ---          | GLEAN_06829 | Unknown | ---  |
| 128 | 4 | CYP350A1   | EFA00865     | GLEAN_03768 | LG3     | 772  |
| 129 | 4 | CYP350B1*  | ---          | ---         | Unknown | 454  |
| 130 | 4 | CYP350C1   | EEZ97716     | GLEAN_11180 | LG10    | 495  |
| 131 | 4 | CYP351A1   | EFA05167     | GLEAN_15293 | LG6     | 921  |
| 132 | 4 | CYP351A2   | EFA05709     | GLEAN_15292 | LG6     | 491  |
| 133 | 4 | CYP351A3   | EFA05708     | GLEAN_15291 | LG6     | 488  |
| 134 | 4 | CYP351A4   | EFA05707     | GLEAN_15290 | LG6     | 495  |
| 135 | 4 | CYP351A5   | EFA05706     | GLEAN_15289 | LG6     | 492  |
| 136 | 4 | CYP351A6   | EFA05705     | GLEAN_15288 | LG6     | 501  |
| 137 | 4 | CYP351A7   | EFA05704     | GLEAN_15287 | LG6     | 502  |
| 138 | 4 | CYP351A8   | EFA05703     | GLEAN_15286 | LG6     | 495  |
| 139 | 4 | CYP351B1   | XP_973400    | GLEAN_15293 | Unknown | 1274 |
| 140 | 4 | CYP351C1   | EFA05717     | GLEAN_15343 | LG6     | 467  |
| 141 | 4 | CYP351D1   | EFA02923     | GLEAN_15287 | LG4     | 499  |
| 142 | 4 | CYP352A1   | EEZ99364     | GLEAN_04973 | LG2     | 495  |
| 143 | 4 | CYP352A2   | EEZ99363     | GLEAN_04972 | LG2     | 163  |

\*More information is available in the P450 homepage: <http://drnelson.uthsc.edu/CytochromeP450.html>
