# Supplementary material for: Integrated analysis of cytochrome P450 gene superfamily in the red flour beetle, Tribolium castaneum
Source: PubMed Central journal article supplement (PMC3682917; doi:10.1186/1471-2164-14-174), 2013-03-14

# Additional file 3

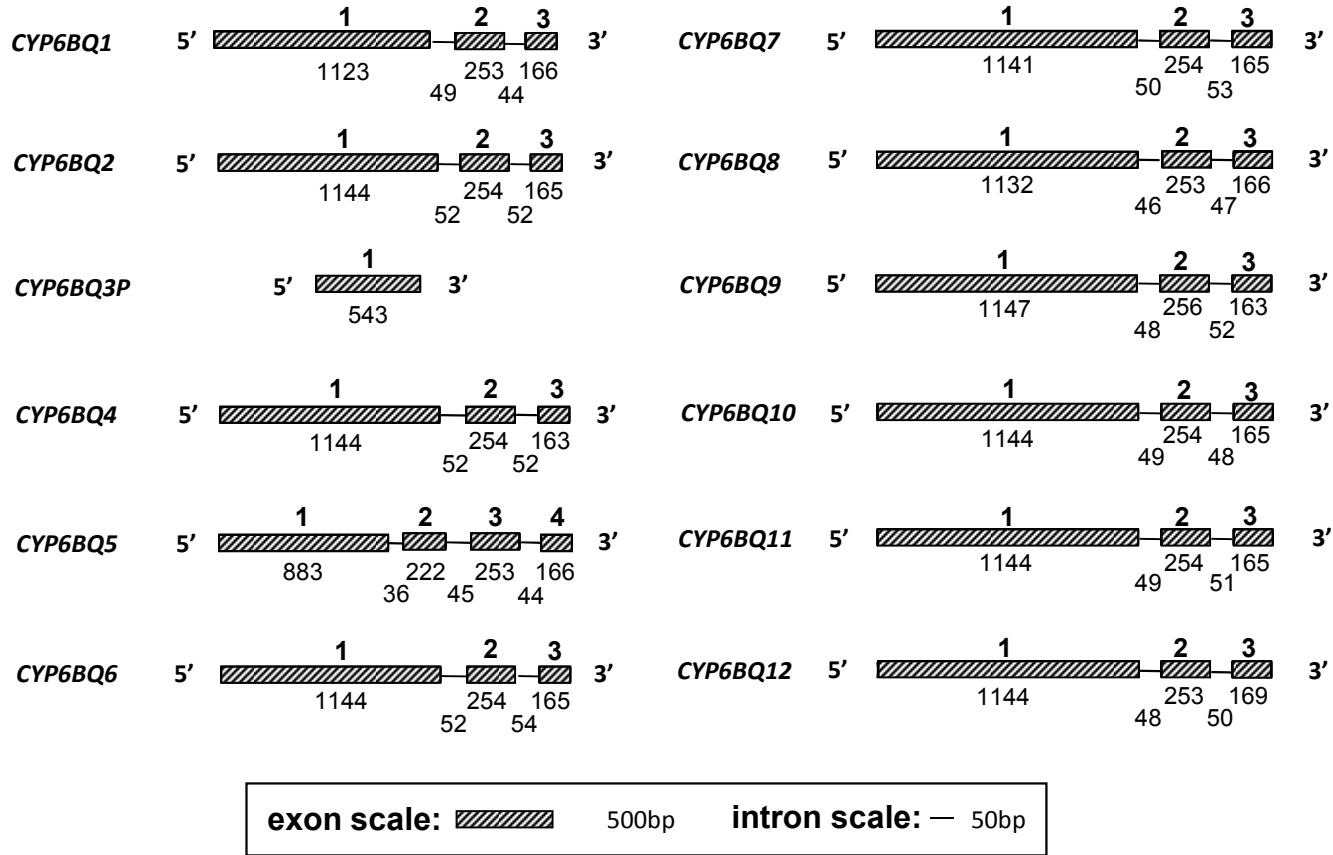

Supplement: 1471-2164-14-174-S3.pdf [file 1471-2164-14-174-S3.pdf]
