# Supplementary material for: Integrated analysis of cytochrome P450 gene superfamily in the red flour beetle, Tribolium castaneum
Source: PubMed Central journal article supplement (PMC3682917; doi:10.1186/1471-2164-14-174), 2013-03-14
Supplement: 1471-2164-14-174-S6.pdf [file 1471-2164-14-174-S6.pdf]

|              |   |        | αA''  | αA''  | αA''    | αA''  | αA''  | αA''  | αA''       |    |
|--------------|---|--------|-------|-------|---------|-------|-------|-------|------------|----|
|              |   |        | ~~~~~ | ~~~~~ | ~~~~~   | ~~~~~ | ~~~~~ | ~~~~~ | ~~~~~      |    |
| CYP6BQ8-GA   | 1 | .....  | MLLN  | NFTLN | .....   | I     | LAV   | .F    | .....      | 14 |
| CYP6BQ8-LBS  | 1 | .....  |       |       |         |       |       |       |            | 1  |
| CYP6BQ8-PYR  | 1 | .....  |       |       |         |       |       |       |            | 1  |
| CYP6BQ9-GA   | 1 | .....  |       |       |         |       |       |       |            | 1  |
| CYP6BQ9-LBS  | 1 | .....  |       |       |         |       |       |       | MTLIT.N.NV | 8  |
| CYP6BQ9-PYR  | 1 | .....  |       |       |         |       |       |       | M          | 1  |
| CYP6BQ10-GA  | 1 | M....  | T     | ..... | LITNNIT | .L    | .NLV  | .A    | .....      | 14 |
| CYP6BQ10-LBS | 1 | .....  |       |       |         |       |       |       | MTLIT      | 5  |
| CYP6BQ10-PYR | 1 | .....  |       |       |         |       |       |       |            | 1  |
| CYP6BQ11-GA  | 1 | .MSLIT | ..... | DNLTF | .....   | DLIA  | .I    | .LATI | L          | 20 |
| CYP6BQ11-LBS | 1 | .....  |       |       |         |       |       |       |            | 1  |
| CYP6BQ11-PYR | 1 | .....  |       |       |         |       |       |       |            | 1  |

|              |    |          | αA''  | αA''       | αA''     | αA''     | αA''  | αA''  | αA''       |    |
|--------------|----|----------|-------|------------|----------|----------|-------|-------|------------|----|
|              |    |          | ~~~~~ | ~~~~~      | ~~~~~    | ~~~~~    | ~~~~~ | ~~~~~ | ~~~~~      |    |
| CYP6BQ8-GA   | 14 | .....    |       |            |          |          |       |       |            | 14 |
| CYP6BQ8-LBS  | 1  | .....    |       |            |          |          |       |       |            | 1  |
| CYP6BQ8-PYR  | 1  | .....    |       |            |          |          |       |       |            | 1  |
| CYP6BQ9-GA   | 1  | .....    |       |            |          |          |       |       | M          | 1  |
| CYP6BQ9-LBS  | 9  | TFDLIAIL | ..... |            |          |          |       | A     | .....      | 17 |
| CYP6BQ9-PYR  | 1  | .....    |       |            |          |          |       |       |            | 1  |
| CYP6BQ10-GA  | 14 | .....    | I     | .....      |          |          |       |       |            | 15 |
| CYP6BQ10-LBS | 5  | .N       | ..... |            |          |          |       | NI    | TLDFVAIIAT | 18 |
| CYP6BQ10-PYR | 1  | .....    |       |            | MTLITNNI | TLDLVAII | ..... |       |            | 16 |
| CYP6BQ11-GA  | 20 | .....    |       |            |          |          |       |       |            | 20 |
| CYP6BQ11-LBS | 1  | .....    | MS    | LITDNLTFDL | VA       | .....    |       | I     | .....      | 15 |
| CYP6BQ11-PYR | 1  | .....    |       |            |          |          |       |       | M          | 1  |

|              |    |          | αA'   | αA'   | αA'     | αA'    | αA'   | αA' | αA'      |    |
|--------------|----|----------|-------|-------|---------|--------|-------|-----|----------|----|
|              |    |          | ~     | ~     | ~       | ~      | ~     | ~   | ~        |    |
| CYP6BQ8-GA   | 14 | .....    |       |       |         |        |       |     |          | 14 |
| CYP6BQ8-LBS  | 1  | .....    |       |       | MLLNNE  | TLNILA | VFV   | TI  | .....    | 17 |
| CYP6BQ8-PYR  | 1  | .....    |       |       | MLLNFTL | NILA   | ..... | V   | FITVL    | 19 |
| CYP6BQ9-GA   | 1  | .T       | ..... |       |         |        |       |     | L        | 3  |
| CYP6BQ9-LBS  | 17 | .....    |       |       |         |        |       |     |          | 17 |
| CYP6BQ9-PYR  | 1  | .....    |       |       |         |        |       |     |          | 1  |
| CYP6BQ10-GA  | 15 | .....    |       |       |         |        |       |     |          | 15 |
| CYP6BQ10-LBS | 19 | FLV      | ..... |       |         |        |       |     | G        | 22 |
| CYP6BQ10-PYR | 16 | .....    |       |       |         |        |       |     |          | 16 |
| CYP6BQ11-GA  | 20 | .....    |       |       |         |        |       |     |          | 20 |
| CYP6BQ11-LBS | 15 | .....    |       |       |         |        |       |     |          | 15 |
| CYP6BQ11-PYR | 1  | .SLITDNL | TFN   | ..... |         |        |       |     | LVAILATI | 19 |

|              |    |       | αA'   | αA'   | αA'   | αA'   | αA'   | αA'   | αA'    |    |
|--------------|----|-------|-------|-------|-------|-------|-------|-------|--------|----|
|              |    |       | ~~~~~ | ~~~~~ | ~~~~~ | ~~~~~ | ~~~~~ | ~~~~~ | ~~~~~  |    |
| CYP6BQ8-GA   | 14 | ...V  | ..... | TIL   | V     | ..... | G     | ..... | V      | 21 |
| CYP6BQ8-LBS  | 17 | .LV   | ..... | G     | ..... | V     | IVY   | ..... | F      | 25 |
| CYP6BQ8-PYR  | 19 | ..... |       |       |       | GVI   | .V    | ..... |        | 23 |
| CYP6BQ9-GA   | 4  | I.TNN | ..... | LT    | L     | D     | ..... | L     | .....  | 16 |
| CYP6BQ9-LBS  | 17 | ..... |       |       | T     | ..... | LLV   | C.V   | .....  | 23 |
| CYP6BQ9-PYR  | 2  | T.L   | ITNNL | T     | ..... | FDLI  | A     | ..... | I.L    | 19 |
| CYP6BQ10-GA  | 15 | ...I  | ..... | A     | ..... | T     | ..... | FLVG  | .I     | 26 |
| CYP6BQ10-LBS | 22 | ..... |       |       |       |       |       | I     | .I     | 25 |
| CYP6BQ10-PYR | 16 | ..... |       |       | V     | T     | ..... | FLV   | GIIVYF | 27 |
| CYP6BQ11-GA  | 20 | ..... |       |       | V     | G     | ..... | I     | .....  | 26 |
| CYP6BQ11-LBS | 15 | ..... |       |       |       |       | LATIL | ..... | VG     | 26 |
| CYP6BQ11-PYR | 20 | L.V   | ..... |       |       |       | G     | I.I   | .....  | 24 |

|              |    |       | αA'   | αA'   | αA'    | αA'     | αA'      | αA'    | αA'    |      |    |
|--------------|----|-------|-------|-------|--------|---------|----------|--------|--------|------|----|
|              |    |       | ~~~~~ | ~~~~~ | ~~~~~  | ~~~~~   | ~~~~~    | ~~~~~  | ~~~~~  |      |    |
| CYP6BQ8-GA   | 21 | ..... |       | IVY   | FKWHL  | SYWDR   | LGVP     | SLSPVL | FFGDTK | 51   |    |
| CYP6BQ8-LBS  | 25 | ..... |       | KW    | ...HLS | YWDR    | LGVP     | SLSPVL | FFGDTK | 51   |    |
| CYP6BQ8-PYR  | 23 | ..... |       | YF    | .KW    | ...HLS  | YWDR     | LGVP   | SLSPVL | 51   |    |
| CYP6BQ9-GA   | 16 | .ATF  | LVGII | VYF   | .K     | ...W    | ...QLS   | YWDR   | LGVP   | SLNP | 53 |
| CYP6BQ9-LBS  | 24 | IA    | .Y    | ..... | L      | .KW     | ...HLTY  | WNR    | LGVP   | SLNP | 53 |
| CYP6BQ9-PYR  | 19 | .L    | VCV   | ...I  | AYL    | .K      | ...WHLTY | WNR    | LGVP   | SLNP | 53 |
| CYP6BQ10-GA  | 26 | ..... |       | F     | ...KWQ | LSYWDR  | LGVP     | SLNP   | TL     | 53   |    |
| CYP6BQ10-LBS | 25 | ..... |       | F     | FKWQ   | LSYWDR  | LGVP     | SLNP   | PAL    | 53   |    |
| CYP6BQ10-PYR | 27 | ..... |       | K     | .W     | QLSYWDR | LGVP     | SLNP   | M      | 56   |    |
| CYP6BQ11-GA  | 26 | ..... |       |       | FKWQ   | LSYWDR  | LGVP     | SLNP   | PVL    | 53   |    |
| CYP6BQ11-LBS | 26 | ..... |       |       | FKWQ   | LSYWDR  | LGVP     | SLNP   | PVL    | 53   |    |
| CYP6BQ11-PYR | 24 | ..... |       | VYF   | KW     | QLSYWDR | LGVP     | SLNP   | PVL    | 53   |    |

|              |    | $\alpha A$  | $\alpha A$ | $\alpha A$ | $\alpha A$ | $\beta 1-1$ |    |
|--------------|----|-------------|------------|------------|------------|-------------|----|
| CYP6BQ8-GA   | 51 | ...LILS..   | ...K.C...T | I.G.....E  | QFRVFYNKF. | K.SKG.FKHG  | 78 |
| CYP6BQ8-LBS  | 51 | ...L.....   | .I...LSKCT | .I.GEQFRV  | FYNKFYSKGF | .....KHG    | 78 |
| CYP6BQ8-PYR  | 51 | ...L.....   | .I...L...S | KCTIGEQFRV | FYNKFYSKGY | .....KHG    | 78 |
| CYP6BQ9-GA   | 53 | ...Y.....   | .IFAKC...S | L.G.....E  | QFKELYDQFK | SK...GYKHG  | 80 |
| CYP6BQ9-LBS  | 53 | ...Y.....   | .L...FGKCG | V.G.....E  | QFAKFYKFK  | SK.G..YKHG  | 80 |
| CYP6BQ9-PYR  | 53 | ...YLFG..   | ...K.C...G | V.G.....E  | QFAKFYKFK  | SK.G.Y.KHG  | 80 |
| CYP6BQ10-GA  | 53 | ...Y...IF   | AK...C...S | L.G.....E  | QFKELYDQFK | ..SKG.YKHG  | 80 |
| CYP6BQ10-LBS | 53 | ...YIFA.... | .K...C...S | L.G.....E  | QFKELYDQFK | SK...GYKHG  | 80 |
| CYP6BQ10-PYR | 56 | ...A.....   | .K...C...S | L.G.....E  | QFKELYDQFK | SK...GYKHG  | 80 |
| CYP6BQ11-GA  | 53 | ...FI...LA  | .K...C...T | L.G.....E  | QFKEFYKFK  | ..SKG.YKHG  | 80 |
| CYP6BQ11-LBS | 53 | ...FILA..   | ...K.C...T | L.G.....E  | QFKEFYKFK  | SK...GYKHG  | 80 |
| CYP6BQ11-PYR | 54 | FI.LA....   | .K...C...T | L.G.....E  | QFKEFYKFK  | SK...GYKHG  | 80 |

|              |    | $\beta 1-1$ | $\beta 1-2$ | $\alpha B$ | $\alpha B$ | $\alpha B'$ | $\alpha B'$ |     |
|--------------|----|-------------|-------------|------------|------------|-------------|-------------|-----|
| CYP6BQ8-GA   | 79 | GIFFGPIPFY  | IAIDPEIIKH  | ILQKDFQHF  | NHG.YYI.N. | E.EDDPLTGH  |             | 124 |
| CYP6BQ8-LBS  | 79 | GIFFGPVPFY  | IAIDPEIIKH  | ILQKDFQHF  | NHG.YYI.NE | E..DDPLTGH  |             | 124 |
| CYP6BQ8-PYR  | 79 | GIFFGPIPFY  | IAIDPEIIKH  | ILQKDFQHF  | NHG.YYI.NE | E..DDPLTGH  |             | 124 |
| CYP6BQ9-GA   | 81 | GIFVGPVPFY  | IPVDPDLGKH  | IMQKDFQHF  | NHGFYIN.E. | E..VDPLTGN  |             | 126 |
| CYP6BQ9-LBS  | 81 | GIFVGPVPFY  | IPVDPDLVKH  | IMQKDFQHF  | NHG.FYINE. | E..VDPLTGN  |             | 126 |
| CYP6BQ9-PYR  | 81 | GIFVGPVPFY  | IPVDPDLVKH  | IMQKDFQHF  | NHGFYIN.E. | E..VDPLTGN  |             | 126 |
| CYP6BQ10-GA  | 81 | GIFVGPVPFY  | IPIDPEIVQH  | IMQKDFHHF  | NHG.NYF.D. | E.NADPLSGH  |             | 126 |
| CYP6BQ10-LBS | 81 | GIFVGPVPFY  | IPIDPEIVQH  | IMQKDF.HHF | MNH.GNY.FD | E.NADPLSGH  |             | 126 |
| CYP6BQ10-PYR | 81 | GIFVGPVPFY  | IPIDPEIVQH  | IMQKDF.HHF | MNH.GNY.FD | E.NADPLSGH  |             | 126 |
| CYP6BQ11-GA  | 81 | GIFLGPVPFY  | VPIDPELVKH  | IMQKDFQHFV | NHG.NYF.D. | E.DADPLSGH  |             | 126 |
| CYP6BQ11-LBS | 81 | GIFLGPVPFY  | VPIDPELVKH  | IMQKDFQHFV | NHGNFYD.E. | D..ADPLSGH  |             | 126 |
| CYP6BQ11-PYR | 81 | GIFLGPVPFY  | VPVDPPELVKH | IMQKDF.QHF | VNH.GNY.F. | DEDADPLSGH  |             | 126 |

|              |     | $\alpha B'$ | $\alpha C$ | $\alpha C$ | $\alpha C'$ | $\alpha C'$ | $\alpha C'$ |     |
|--------------|-----|-------------|------------|------------|-------------|-------------|-------------|-----|
| CYP6BQ8-GA   | 125 | LLNLENVKWK  | NMRAKLTPTF | TSGKMKIMFQ | TLADYTTGLK  | KVMDDSALNH  |             | 174 |
| CYP6BQ8-LBS  | 125 | LLNLENVKWK  | NMRAKLTPTS | TSGKMKIMFQ | TLADYTTGLK  | KVMDDSALNH  |             | 174 |
| CYP6BQ8-PYR  | 125 | LLNLENVKWK  | NMRAKLTPTF | TSGKMKIMFQ | TLADCTTGLK  | KVMDDSALNH  |             | 174 |
| CYP6BQ9-GA   | 127 | LFSLEDAKWR  | NMRVKLTPTF | TSGKMKMMFQ | TLADCTRGLK  | EIMDNLALNH  |             | 176 |
| CYP6BQ9-LBS  | 127 | LFSLEDAKWR  | NMRVKLTPTF | TSGKMKMMFQ | TLADCTRGLK  | EIMDNLALNH  |             | 176 |
| CYP6BQ9-PYR  | 127 | LFSLEDAKWR  | NMRVKLTPTF | TSGKMKMMFQ | TLADCTRGLK  | EIMDNLALNH  |             | 176 |
| CYP6BQ10-GA  | 127 | LFNLEDSKWK  | NMRVKLTPTF | TSGKMKMMFQ | TLADCTRGLD  | EIMDNSALNH  |             | 176 |
| CYP6BQ10-LBS | 127 | LFNLEDSKWK  | NMRVKLTPTF | TSGKMKMMFQ | TLADCTRGLD  | EIMDNSALNH  |             | 176 |
| CYP6BQ10-PYR | 127 | LFNLEDSKWK  | NMRVKLTPTF | TSGKMKMMFQ | TLADCTRGLD  | EIMDNSALNH  |             | 176 |
| CYP6BQ11-GA  | 127 | LFNLEDAKWK  | NMRIKLTPTF | TSGKIKMMFQ | TLADCTRGLD  | EIMDHSALNH  |             | 176 |
| CYP6BQ11-LBS | 127 | LFNLEDAKWK  | NMRIKLTPTF | TSGKIKMMFQ | TLADCTRGLK  | EIMDHSALNH  |             | 176 |
| CYP6BQ11-PYR | 127 | LFNLEDAKWK  | NMRIKLTPTF | TSGKIKMMFQ | TLADCTRGLK  | EIMDHSALNH  |             | 176 |

|              |     | $\alpha D$ | $\alpha D$ | $\alpha D'$ | $\alpha E$ |            |     |
|--------------|-----|------------|------------|-------------|------------|------------|-----|
| CYP6BQ8-GA   | 175 | TPVDIKDIFG | RFTTDIIGSV | AFGIECNSLE  | NPDAEFRKYG | KKVFEIDFFG | 224 |
| CYP6BQ8-LBS  | 175 | TPVDIKDIFG | RFTTDIIGSV | AFGIECNSLE  | NPDAEFRKYG | KKVFEIDFFG | 224 |
| CYP6BQ8-PYR  | 175 | TPVDIKDIFG | RFTTDIIGSV | AFGIECNSLE  | NPDAEFRKYG | KKVFEIDFFG | 224 |
| CYP6BQ9-GA   | 177 | APADIKEILG | RFTTDIIGSV | AFGIECNSLK  | NPDAEFRKYG | RKIVETGFID | 226 |
| CYP6BQ9-LBS  | 177 | APADIKEILG | RFTTDIIGSV | AFGIECNSLK  | NPDAEFRKYG | RKIVETGFID | 226 |
| CYP6BQ9-PYR  | 177 | APADIKEILG | RFTTDIIGSV | AFGIECNSLK  | NPDAEFRKYG | RKIVESGFID | 226 |
| CYP6BQ10-GA  | 177 | APADIKDILG | RFTTDIIGSV | AFGIECNSLK  | NPDAEFRKYG | RRVFEVGIID | 226 |
| CYP6BQ10-LBS | 177 | APADIKDILG | RFTTDIIGSV | AFGIECNSLK  | NPDAEFRKYG | RRVFEVGIID | 226 |
| CYP6BQ10-PYR | 177 | TPADIKDILG | RFTTDIIGSV | AFGIECNSLK  | NPDAEFRKYG | RRVFEVGIID | 226 |
| CYP6BQ11-GA  | 177 | APADIKDILG | RFTTDIIGSV | AFGIECNSLK  | DPDAEFRKYG | RKVFEVGF.I | 225 |
| CYP6BQ11-LBS | 177 | APADIKDILG | RFTTDIIGSV | AFGIECNSLK  | DPDAEFRKYG | RKVFEVGF.I | 225 |
| CYP6BQ11-PYR | 177 | APADIKDILG | RFTTDIIGSV | AFGIECNSLK  | DPDAEFRKYG | RKVFEVGF.I | 225 |

|              |     | $\alpha E$  | $\alpha E'$ | $\alpha F$ | $\alpha F$ | $\alpha F$ |     |
|--------------|-----|-------------|-------------|------------|------------|------------|-----|
| CYP6BQ8-GA   | 224 | .RIKTLCTFA  | IPHPILRLFR  | FKFYNSDVAT | FFMDAIRETV | NYREKNNIYR | 273 |
| CYP6BQ8-LBS  | 225 | RIKTLCT.FA  | IPHPILRLFR  | FKFYNSDVAT | FFMDAIRETV | NYREKNNIYR | 273 |
| CYP6BQ8-PYR  | 225 | RIKTLCT.FA  | IPHPILRLFR  | FKFYNSDVAT | FFMDAIRETV | NYREKNNIYR | 273 |
| CYP6BQ9-GA   | 226 | .RIKVFLVLS  | IPHALLRFWR  | FKFTNTEVET | FFMGAIQDTV | NYREKNNVYR | 275 |
| CYP6BQ9-LBS  | 227 | RIKVFLV.LS  | IPHALLRFWR  | FKFTNTEVET | FFMGAIQDTV | NYREKNNVYR | 275 |
| CYP6BQ9-PYR  | 227 | RIKVFLV.LS  | IPHALLRFWR  | FKFTNTEVET | FFMGAIQDTV | NYREKNNVYR | 275 |
| CYP6BQ10-GA  | 227 | TIKLIICI.LS | LPDSVLRLLK  | LKFTKSDVEN | FFMNAIRDTV | NYREKNNIYR | 275 |
| CYP6BQ10-LBS | 227 | TIKIICILS.  | LPDSVLRLLK  | FRFTKSDVEN | FFMNAIRDTV | NYRE.KNNIY | 274 |
| CYP6BQ10-PYR | 227 | RIKIICILA.  | LPDSVLRLLK  | LKFTKSDVEN | FFMNAIRDTV | NYRE.KNNIY | 274 |
| CYP6BQ11-GA  | 226 | DRLKTICILS  | LPHPVLRFFK  | LKFTKSDVEK | FFMSAIRDTV | NYREKNNIYR | 275 |
| CYP6BQ11-LBS | 226 | DRLKTICILS  | LPHPVLRFFK  | LKFTKSDVEK | FFMSAIRDTV | NYREKNNIYR | 275 |
| CYP6BQ11-PYR | 226 | DRLKTICILS  | LPHPVLRFFK  | LKFTKSDVEK | FFMSAIRDTV | NYRE.KNNIY | 274 |

|              |     | $\alpha$ G |    | $\alpha$ H  |            | $\alpha$ H |            | $\alpha$ H | $\alpha$ H |     |
|--------------|-----|------------|----|-------------|------------|------------|------------|------------|------------|-----|
| CYP6BQ8-GA   | 273 | .KDFMHL    | LQ | LKNR...GLV  | ....TD.D.  | ....EK...  | .....      | .....      | .....      | 294 |
| CYP6BQ8-LBS  | 273 | .KDFMHL    | LQ | LKNRG...LV  | ....T.D.   | .....      | .....      | DE.....    | .....      | 295 |
| CYP6BQ8-PYR  | 273 | .KDFMHL    | LQ | LKNRG...LVT | ....D.D.   | EK...I...  | ..T.G.D.   | .....      | .....      | 300 |
| CYP6BQ9-GA   | 275 | .KDFMHL    | LQ | LKNRG...LV  | ....AD...  | ....D....  | .....      | .....      | .....      | 296 |
| CYP6BQ9-LBS  | 275 | .KDFMHL    | LQ | LKNRGLVAD   | ....DQKI   | ....T....  | ..D.....   | .....      | .....      | 299 |
| CYP6BQ9-PYR  | 275 | .KDFMHL    | LQ | LKNR...GLV  | ..AD...DQ  | KITD.....  | ..DKGN..   | .....      | .....      | 304 |
| CYP6BQ10-GA  | 275 | .KDFMHL    | LQ | LKNRG...SV  | ....TD...  | .D.E.....  | ....K.V.T. | .....      | .....      | 298 |
| CYP6BQ10-LBS | 275 | RKDFMHL    | LQ | LKNRG...S   | ....VTD... | .D.EKV...T | DD.....    | .....      | .....      | 303 |
| CYP6BQ10-PYR | 275 | RKDFMHL    | LQ | LKNRG...S   | ....VT...  | ..D..D...  | .E.....    | .....      | .....      | 296 |
| CYP6BQ11-GA  | 275 | .KDFMHL    | LQ | LKNR...GFV  | A...DD..G  | ....KV...  | .....      | .....      | .....      | 298 |
| CYP6BQ11-LBS | 275 | .KDFMHL    | LQ | LKNR...GFV  | ADDGK.V.T  | ....D....  | .....      | .....      | .....      | 301 |
| CYP6BQ11-PYR | 275 | RKDFMHL    | LQ | LKNR...GFV  | A...D....  | .DG...KVT  | .D.....    | .....      | .....      | 299 |

|              |     | $\alpha$ H | $\alpha$ H  | $\alpha$ H |            | $\alpha$ I | $\alpha$ I | $\alpha$ I |     |
|--------------|-----|------------|-------------|------------|------------|------------|------------|------------|-----|
| CYP6BQ8-GA   | 295 | ITG...D... | ..KDIV...T  | EALTMNELAA | QAFVFFLAGF | ETSSTAMTWA | .....      | .....      | 333 |
| CYP6BQ8-LBS  | 295 | ..TGDKD..  | ..I...V...T | EALTMNELAA | QAFVFFLAGF | ETSSTAMTWA | .....      | .....      | 333 |
| CYP6BQ8-PYR  | 300 | .....      | ..I...V...T | EALTMNELAA | QAFVFFLAGF | ETSSTAMTWA | .....      | .....      | 333 |
| CYP6BQ9-GA   | 297 | I.T...D.DK | G...NIKEN   | DLITINELAA | QAFVFFLGGF | ETSSTVSWA  | .....      | .....      | 337 |
| CYP6BQ9-LBS  | 299 | ...D..K... | ..GN.IK.EN  | DLITINELAA | QAFVFFLGGF | ETSSTMSWA  | .....      | .....      | 337 |
| CYP6BQ9-PYR  | 304 | .....      | ..K...E...N | DLITINELAA | QAFVFFLGGF | ETSSTMSWA  | .....      | .....      | 337 |
| CYP6BQ10-GA  | 298 | ...D.DKD.. | ..NV.K...E  | KALTLNELSA | QAFVFFLAGF | ETSSTMTWA  | .....      | .....      | 336 |
| CYP6BQ10-LBS | 303 | .....      | ..V.K...E   | KALTLNELSA | QAFVFFLAGF | ETSSTMTWA  | .....      | .....      | 336 |
| CYP6BQ10-PYR | 297 | VTD.....D  | KDN.VK...E  | KALTLNELSA | QAFVFFLAGF | ETSSTMTWA  | .....      | .....      | 336 |
| CYP6BQ11-GA  | 298 | ..DE..K... | ..EN.VK...E | KALTLNELSA | QAFVFFLAGF | ETSSTMTWA  | .....      | .....      | 336 |
| CYP6BQ11-LBS | 301 | .....      | ..ENVK...E  | KALTLNELSA | QAFVFFLAGF | ETSSTMTWA  | .....      | .....      | 336 |
| CYP6BQ11-PYR | 300 | E.....K    | ..ENVK...E  | KALTLNELSA | QAFVFFLAGF | ETSSTMTWA  | .....      | .....      | 336 |

|              |     | $\alpha$ I | $\alpha$ J | $\alpha$ J |            | $\alpha$ K | $\alpha$ K |     |
|--------------|-----|------------|------------|------------|------------|------------|------------|-----|
| CYP6BQ8-GA   | 334 | LYELAINPDV | QOKLRAEIND | VLRKHNNKLT | YEAMDMTFM  | EKVICETLRK | .....      | 383 |
| CYP6BQ8-LBS  | 334 | LYELAINPDV | QOKLRAEIND | VLRKHNNKLT | YEAMDMTFM  | EKVICETLRK | .....      | 383 |
| CYP6BQ8-PYR  | 334 | LYELAINPDV | QOKLRAEIND | VLRKHNNKLT | YEAMDMTFM  | EKVICETLRK | .....      | 383 |
| CYP6BQ9-GA   | 338 | LYELATNQDI | QEKLKEIND  | VLSRHNNKLS | YDAMMEMTYM | DKVINETLRK | .....      | 387 |
| CYP6BQ9-LBS  | 338 | LYELATNQDI | QEKLKEIND  | VLSRHNNKLS | YDAMMEMTYM | DKVINETLRK | .....      | 387 |
| CYP6BQ9-PYR  | 338 | LYELATNQDI | QEKLKEIND  | VLSRHNNKLS | YDAMMEMTYM | DKVINETLRK | .....      | 387 |
| CYP6BQ10-GA  | 337 | LYELATNQDV | QEKLREINN  | VLSRHDNKLT | YEAMMEMTYM | EKVIHETLRK | .....      | 386 |
| CYP6BQ10-LBS | 337 | LYELATNQNV | QEKLREINN  | VLSRHDNKLT | YEAMMEMTYM | EKVIHETLRK | .....      | 386 |
| CYP6BQ10-PYR | 337 | LYELATNQNV | QEKLREINN  | VLSRHDNKLT | YEAMMEMTYM | EKVIHETLRK | .....      | 386 |
| CYP6BQ11-GA  | 337 | LYELATNQDV | QEKLREINN  | VLSRHDNKLT | YEAMMEMTYM | EKVIHETLRK | .....      | 386 |
| CYP6BQ11-LBS | 337 | LYELATNQDV | QEKLREINN  | VLSRHDNKLT | YEAMMEMTYM | EKVIHETLRK | .....      | 386 |
| CYP6BQ11-PYR | 337 | LYELATNQDV | QEKLREINN  | VLNRYDNKLT | YEAMMEMTYM | EKVIHETLRK | .....      | 386 |

|              |     | $\beta$ 1-4 | $\beta$ 2-1 | $\beta$ 2-2 | $\beta$ 1-3 | $\alpha$ K' | $\alpha$ K' |     |
|--------------|-----|-------------|-------------|-------------|-------------|-------------|-------------|-----|
| CYP6BQ8-GA   | 384 | YPPIPVLRTRK | CTKDYTIPT   | SIQLQRGVSV  | SVPVLALHTD  | PEYYPNPEKF  | .....       | 433 |
| CYP6BQ8-LBS  | 384 | YPPIPVLRTRK | CTKDYTIPT   | SIQLQRGVSV  | SVPVLALHTD  | PEYYPNPEKF  | .....       | 433 |
| CYP6BQ8-PYR  | 384 | YPPIPVLRTRK | CTKDYTIPT   | SIQLQRGVSV  | SVPVLALHTD  | PEYYPNPEKF  | .....       | 433 |
| CYP6BQ9-GA   | 388 | YPLPIIPRV   | CNKDYTIPT   | STKLSRGTAV  | AIPVLAHTD   | PEYYPNPEKF  | .....       | 437 |
| CYP6BQ9-LBS  | 388 | YPLPIIPRV   | CNKDYTIPT   | STKLSRGTAV  | AIPVLAHTD   | PEYYPNPEKF  | .....       | 437 |
| CYP6BQ9-PYR  | 388 | YPLPIIPRV   | CNKDYTIPT   | STKLSRGTAV  | AIPVLAHTD   | PEYYPNPEKF  | .....       | 437 |
| CYP6BQ10-GA  | 387 | YPLPILTRK   | CNKDYTIPT   | SIKLRGTTV   | AIPVGLHTD   | PEYYSKPEKF  | .....       | 436 |
| CYP6BQ10-LBS | 387 | YPLPILTRK   | CNKDYTIPT   | SIKLRGTTV   | AIPVGLHTD   | PEYYSNPEKF  | .....       | 436 |
| CYP6BQ10-PYR | 387 | YPLPILTRK   | CNKDYTIPT   | SIKLRGTTV   | AIPVGLHTD   | PEYYSNPEKF  | .....       | 436 |
| CYP6BQ11-GA  | 387 | YPLPILTRK   | CNKDYTIPT   | SIKLSRGTA   | GIPVLAHTD   | PEYYSNPEKF  | .....       | 436 |
| CYP6BQ11-LBS | 387 | YPLPILTRK   | CNKDYTIPT   | SIKLSRGTA   | GIPVLAHTD   | PEYYSNPEKF  | .....       | 436 |
| CYP6BQ11-PYR | 387 | YPLPILTRK   | CNKDYTIPT   | SIKLSRGTA   | GIPVLAHTD   | PEYYSNPEKF  | .....       | 436 |

|              |     | $\alpha$ K'' | $\alpha$ K'' | $\alpha$ K'' | Heme       | $\alpha$ L | $\alpha$ L | $\alpha$ L | $\beta$ 3-3 |
|--------------|-----|--------------|--------------|--------------|------------|------------|------------|------------|-------------|
| CYP6BQ8-GA   | 434 | DPDRFSDENV   | KARPGFTWLP   | FGGPRICIG    | LRFGLLQSKV | GLTAVLKHYR | .....      | .....      | 483         |
| CYP6BQ8-LBS  | 434 | DPDRFSDENV   | KARPGFTWLP   | FGGPRICIG    | LRFGLLQSKV | GLTAVLKHYR | .....      | .....      | 483         |
| CYP6BQ8-PYR  | 434 | DPDRFSDENV   | KARPGFTWLP   | FGGPRICIG    | LRFGLLQSKV | GLTAVLKHYR | .....      | .....      | 483         |
| CYP6BQ9-GA   | 438 | DPEHFSEENV   | KARPGFTWLP   | FGDGPRICIG   | MRFGMMQSKV | GLATILKNYK | .....      | .....      | 487         |
| CYP6BQ9-LBS  | 438 | DPEHFSEENV   | KARPGFTWLP   | FGDGPRICIG   | MRFGMMQSKV | GLATILKNYK | .....      | .....      | 487         |
| CYP6BQ9-PYR  | 438 | NPEHFSEENV   | KSRPGFTWLP   | FGDGPRICIG   | MRFGMMQSKV | GLATILKNYK | .....      | .....      | 487         |
| CYP6BQ10-GA  | 437 | DPEHFSEENV   | KSRPGFTWLP   | FGDGPRICIG   | LRFGMLQSKV | GLTALLKNYK | .....      | .....      | 486         |
| CYP6BQ10-LBS | 437 | DPEHFSEENV   | KTRPGFTWLP   | FGDGPRICIG   | LRFGMLQSKV | GLTALLKNYK | .....      | .....      | 486         |
| CYP6BQ10-PYR | 437 | DPEHFSEENV   | KSRPGFTWLP   | FGDGPRICIG   | LRFGMLQSKV | GLTALLKNYK | .....      | .....      | 486         |
| CYP6BQ11-GA  | 437 | DPEHFSEENV   | KTRPGFTWLP   | FGDGPRICIG   | LRFGMLQSKV | GLTALLKNYK | .....      | .....      | 486         |
| CYP6BQ11-LBS | 437 | DPEHFSEENV   | KTRPGFTWLP   | FGDGPRICIG   | LRFGMLQSKV | GLTALLKNYK | .....      | .....      | 486         |
| CYP6BQ11-PYR | 437 | DPEHFSEENV   | KTRPGFTWLP   | FGDGPRICIG   | LRFGMLQSKV | GLTALLKNYK | .....      | .....      | 486         |

|              | β3-3 |            | β3-2       |                      |
|--------------|------|------------|------------|----------------------|
|              | →    |            | → → →      |                      |
| CYP6BQ8-GA   | 484  | IKLNHKTQLP | VTLNPRSF.I | TSAKGGVWLD VEKID 517 |
| CYP6BQ8-LBS  | 484  | IKLNHKTQLP | VTLNPR.SFI | TSAKGGVWLD VEKID 517 |
| CYP6BQ8-PYR  | 484  | IKLNHKTQLP | VTLNAR.SFI | TSAKGGVWLD VEKID 517 |
| CYP6BQ9-GA   | 488  | IKLNNKTEFP | IKVDPKNE.I | TTAKGGVWLD VEKLD 521 |
| CYP6BQ9-LBS  | 488  | IKLNNKTEFP | IKVDPK.NFI | TTAKGGVWLD VEKLD 521 |
| CYP6BQ9-PYR  | 488  | IKLNNKTEFP | IKVDPKNE.I | TTAKGGVWLD VEKLD 521 |
| CYP6BQ10-GA  | 487  | VILSNKTKFP | VTLDPK.SFI | TTAKDGIWLD VKKLD 520 |
| CYP6BQ10-LBS | 487  | VTLSNKTKFP | VTLDPK.SFI | TTAKDGIWLD VKKLD 520 |
| CYP6BQ10-PYR | 487  | VTLSNKTKFP | VTLDPK.SFI | TTAKDGIWLD VKKLD 520 |
| CYP6BQ11-GA  | 487  | IKLSKKTELP | IKLDPKSF.I | TTAKGGIWLD VEKLD 520 |
| CYP6BQ11-LBS | 487  | IKLSKKTELP | IKLDPKSF.I | TTAKGGIWLD VEKLD 520 |
| CYP6BQ11-PYR | 487  | IKLSKKTELP | IKLDPK.SFI | TTAKGGIWLD VEKLD 520 |
